# Supplementary material for: Xenoposeidon is the earliest known rebbachisaurid sauropod dinosaur
Source: PeerJ journal article supplement (doi:10.7717/peerj.5212), 2018-07-06
Supplement: Supplementary_materials.pdf [file Supplementary_materials.pdf]

**Supplementary materials 1.** Three-dimensional surface model (11 million polygons) of NHMUK PV R2095, the holotype and only vertebra of *Xenoposeidon proneneukos*. A 3D polygon mesh file was created by Heinrich Mallison (Palaeo3D) in Agisoft Photoscan Pro version 1.3.0 ([agisoft.com](http://agisoft.com)), from 95 high resolution digital photographs by the author. All 95 images aligned, and resulted in a dense point cloud at maximum resolution of 20,900,043 points and 44,871,128 polygons. Scaling was based on a single 10 cm scale bar created from a high quality scale bar placed in the pictures with the specimen. Available from <https://doi.org/10.6084/m9.figshare.5605612.v2> and viewable online at <https://sketchfab.com/models/7f88203e0bbb49a194cb254ab05c4b22>

**Supplementary materials 2.** Rotating video, rendered in Rhinoceros 5.0, of three-dimensional surface model (11 million polygons) of NHMUK PV R2095, the holotype and only vertebra of *Xenoposeidon proneneukos*. A 3D polygon mesh file was created by Heinrich Mallison (Palaeo3D) in Agisoft Photoscan Pro version 1.3.0 ([agisoft.com](http://agisoft.com)), from 95 high resolution digital photographs by the author. All 95 images aligned, and resulted in a dense point cloud at maximum resolution of 20,900,043 points and 44,871,128 polygons. Scaling was based on a single 10 cm scale bar created from a high quality scale bar placed in the pictures with the specimen. Available from <https://www.youtube.com/watch?v=2asLY76uUAA>
